# Supplementary material for: Macrophage acetyl-CoA carboxylase regulates acute inflammation through control of glucose and lipid metabolism
Source: PubMed Central journal article supplement (PMC9683712; doi:10.1126/sciadv.abq1984), 2022-11-23
Supplement: sciadv.abq1984_sm.pdf [file sciadv.abq1984_sm.pdf]

Supplementary Materials for  
**Macrophage acetyl-CoA carboxylase regulates acute inflammation through control of glucose and lipid metabolism**

Scott Yeudall *et al.*

Corresponding author: Norbert Leitinger, nl2q@virginia.edu

*Sci. Adv.* **8**, eabq1984 (2022)  
DOI: 10.1126/sciadv.abq1984

**The PDF file includes:**

Figs. S1 to S6

Table S1

Legends for data S1 and S3

Data S2. Uncropped\_Gels\_Blots: Summary PDF of uncropped gels and blots.

**Other Supplementary Material for this manuscript includes the following:**

Data S1 and S3

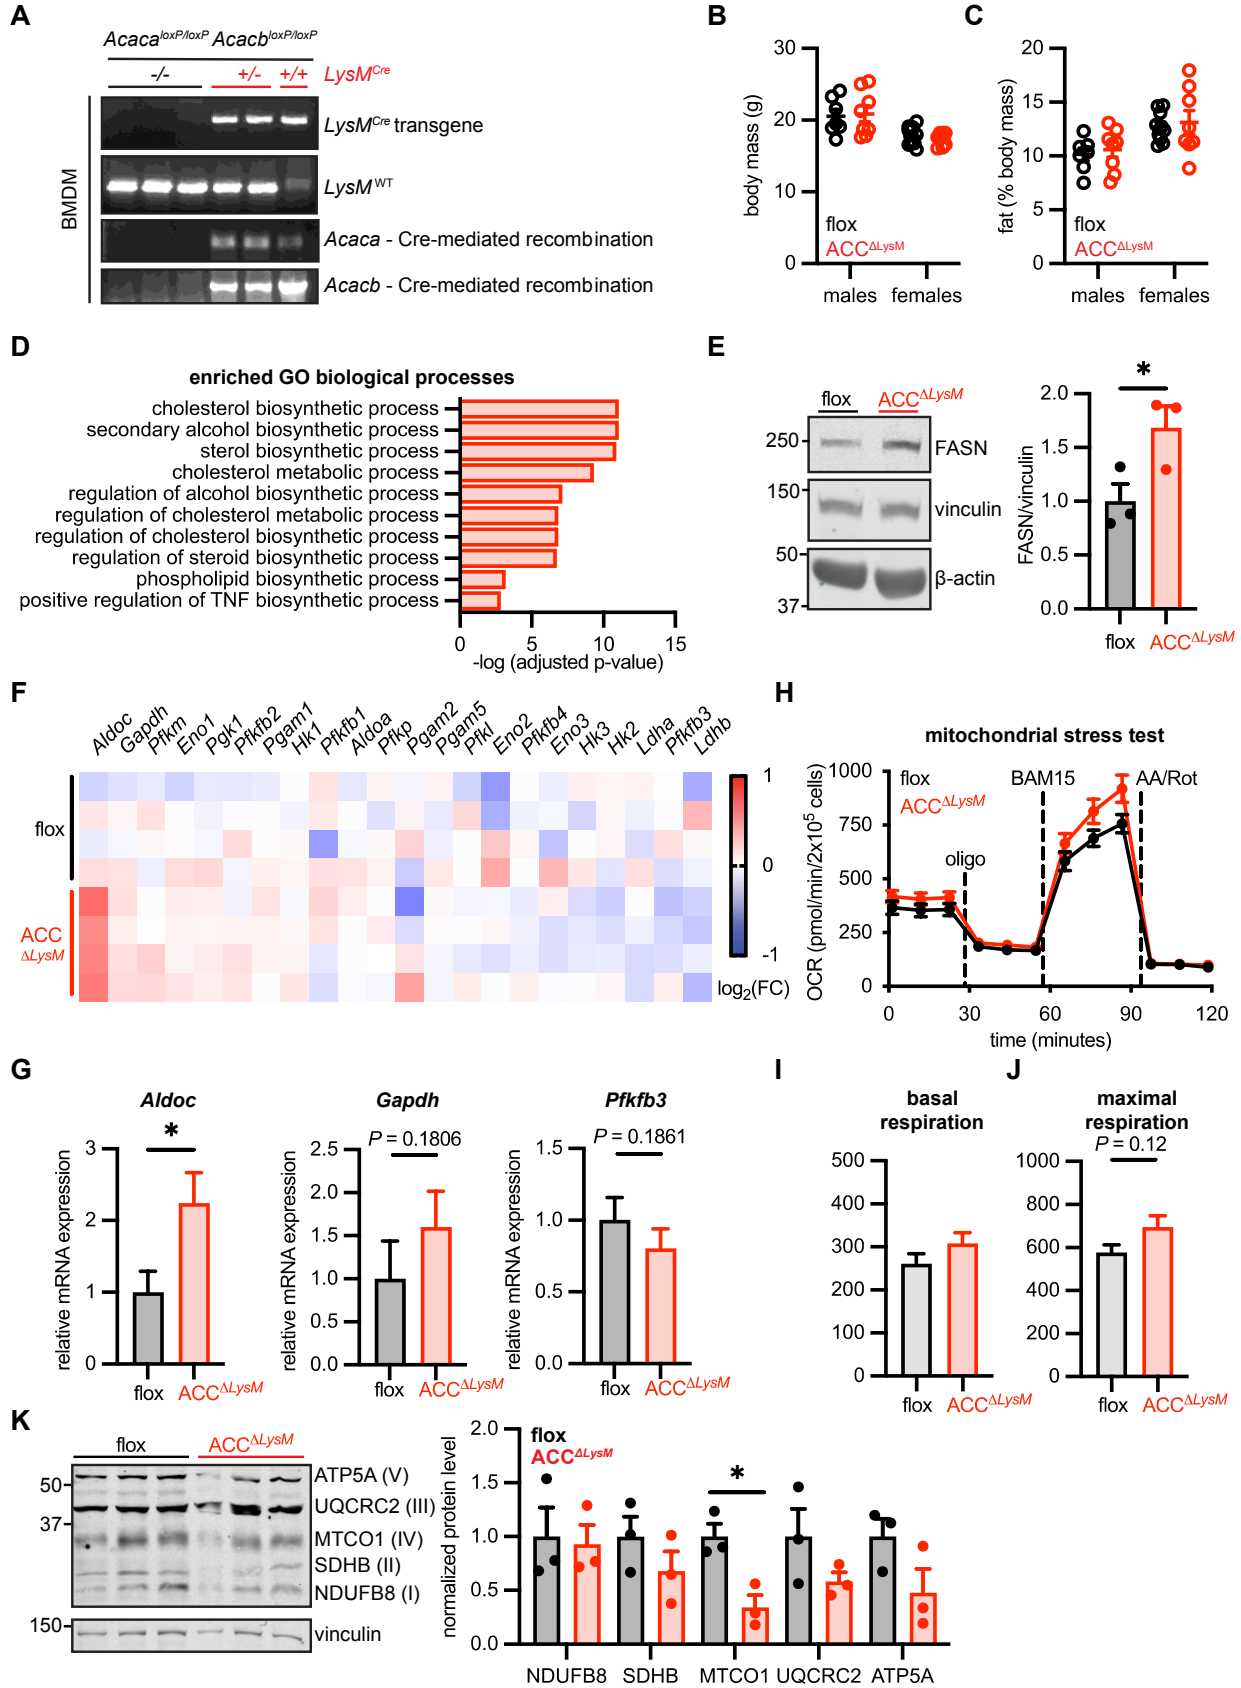

**Supplementary Figure 1, related to Figure 1.**

**A.** Representative genotyping of BMDM samples from flox or ACC<sup>ΔLysM</sup> mice.

**B.** Body mass of flox and ACC<sup>ΔLysM</sup> mice at 8 weeks of age (male flox, n = 7; male ACC<sup>ΔLysM</sup>, n = 8; female flox, n = 10; female ACC<sup>ΔLysM</sup>, n = 8).

**C.** Fat as percentage of total body mass in flox and ACC<sup>ΔLysM</sup> mice at 8 weeks of age (male flox, n = 7; male ACC<sup>ΔLysM</sup>, n = 8; female flox, n = 10; female ACC<sup>ΔLysM</sup>, n = 8).

**D.** Enriched GO Biological Processes from unstimulated ACC<sup>ΔLysM</sup> BMDMs.

**E.** Representative immunoblot analysis and quantification of fatty acid synthase (FASN) in unstimulated BMDMs from flox or ACC<sup>ΔLysM</sup> mice (n = 3 mice per group). Vinculin and β-actin were used as loading controls.

**F.** Heatmap showing fold expression of glycolytic enzyme genes in unstimulated flox and ACC<sup>ΔLysM</sup> BMDMs (n = 4).

**G.** Expression of glycolytic genes *Aldoc*, *Gapdh*, and *Pfkfb3* in unstimulated flox or ACC<sup>ΔLysM</sup> BMDMs (n = 4).

**H.** Mitochondrial stress test (MST) of BMDMs from flox or ACC<sup>ΔLysM</sup> mice (n = 4).

**I.** Basal respiration (calculated as average basal OCR – average post-AA/rot OCR) of flox or ACC<sup>ΔLysM</sup> BMDMs (n = 4).

**J.** Maximal respiration (calculated as average post-BAM15 OCR – average post-AA/rot OCR) of flox or ACC<sup>ΔLysM</sup> BMDMs (n = 4).

**K.** Immunoblot analysis of mitochondrial oxidative phosphorylation complexes (n = 3 mice per group). Vinculin was used as loading control.

Data are represented as mean±SEM. Significance determined by one-tailed Welch's t-test (B, C, E, G, I, J, K). \* *P* < 0.05.

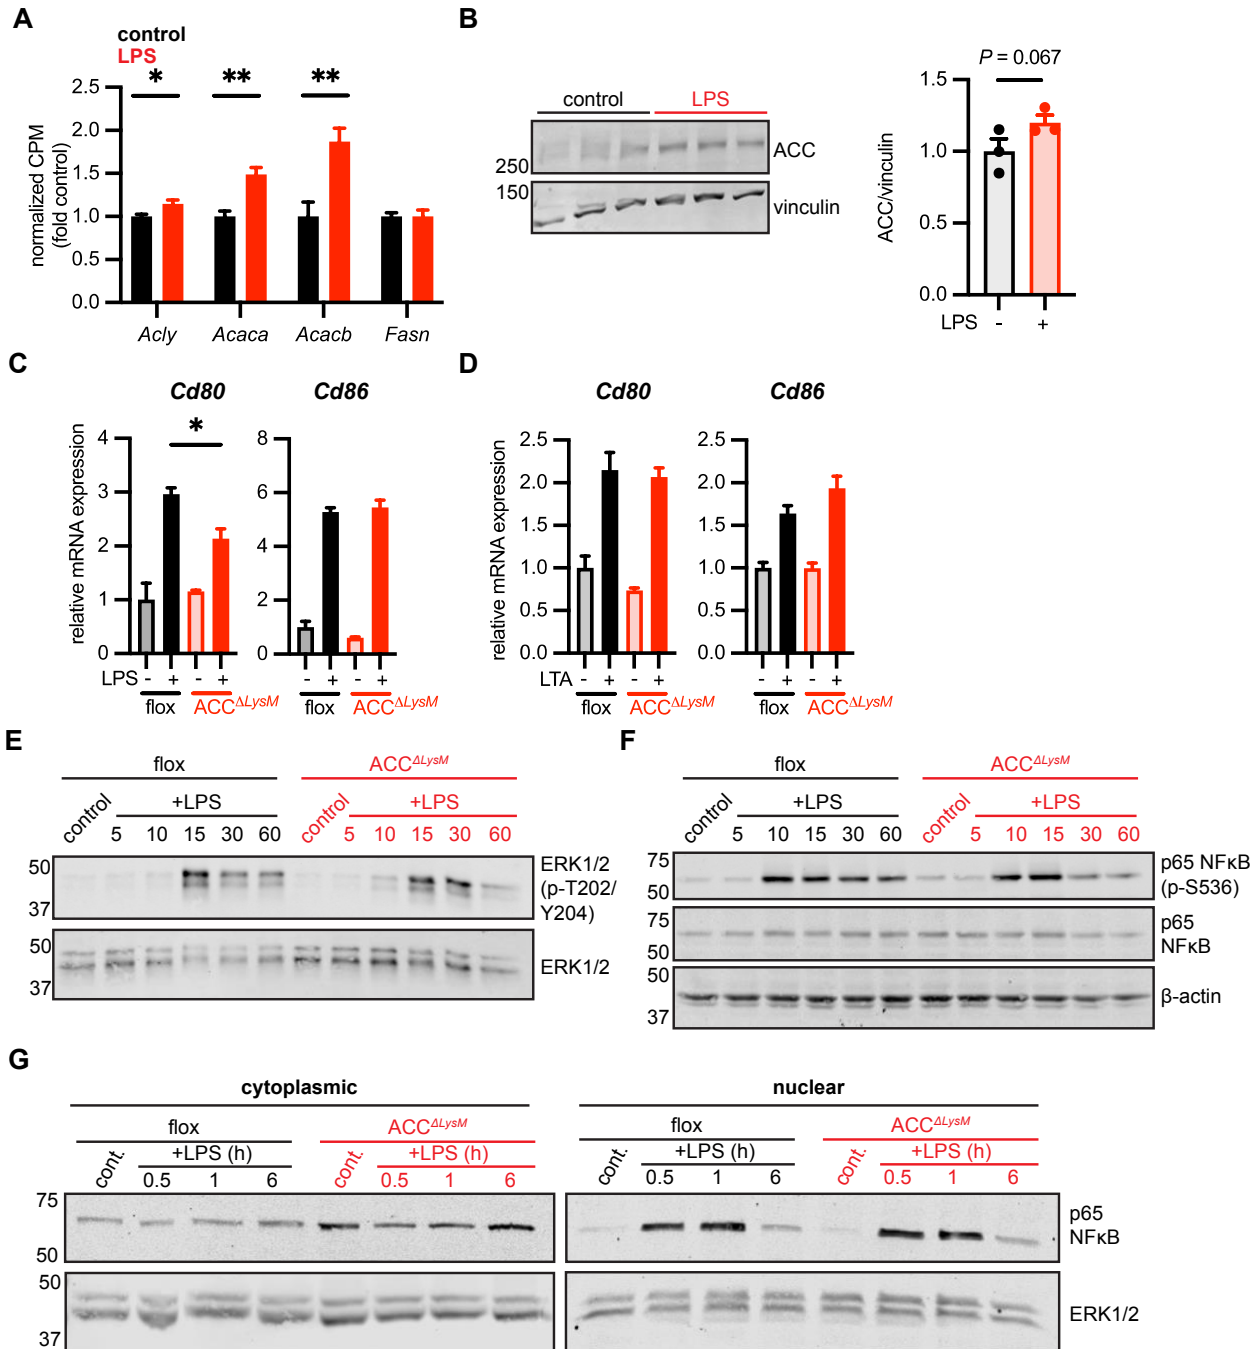

**Supplementary Figure 2, related to Figure 2.**

**A.** Normalized gene expression (normalized counts per million) of *Acly*, *Acaca*, *Acacb*, and *Fasn* of BMDMs treated with control or LPS (100ng/mL) for 6 hours (n = 4).

**B.** Immunoblot and semi-quantification of ACC in BMDMs treated with LPS (100ng/mL) for 6 hours (n = 3). Vinculin was used as a loading control.

**C.** Relative mRNA expression of *Cd80* and *Cd86* in flox or ACC<sup>ΔLysM</sup> BMDMs treated with LPS (100ng/mL) for 6 hours (n = 4).

**D.** Relative mRNA expression of *Cd80* and *Cd86* in flox or ACC<sup>ALysM</sup> BMDMs treated with LTA (1µg/ml) for 6 hours (n = 4).

**E.** Immunoblot of ERK1/2 phosphorylation at T202/Y204 in flox or ACC<sup>ALysM</sup> BMDMs unstimulated or after LPS stimulation (100ng/ml) for 5-60 minutes. Representative of two independent experiments.

**F.** Immunoblot of p65 NF-κB phosphorylation at S536 in flox or ACC<sup>ALysM</sup> BMDMs unstimulated or after LPS stimulation (100ng/ml) for 5-60 minutes. Representative of two independent experiments. β-actin was used as a loading control.

**G.** Immunoblot of total p65 NF-κB in cytoplasmic or nuclear extracts from flox or ACC<sup>ALysM</sup> BMDMs unstimulated or after LPS stimulation (100ng/ml) for 0.5, 1, or 6 hours. Representative of two independent experiments. ERK1/2 was used as a loading control.

Data are represented as mean ± SEM. Significance determined by one-tailed Welch's t-test (A, B) or One-Way ANOVA (C,D) . \*  $P < 0.05$ , \*\*  $P < 0.01$ .

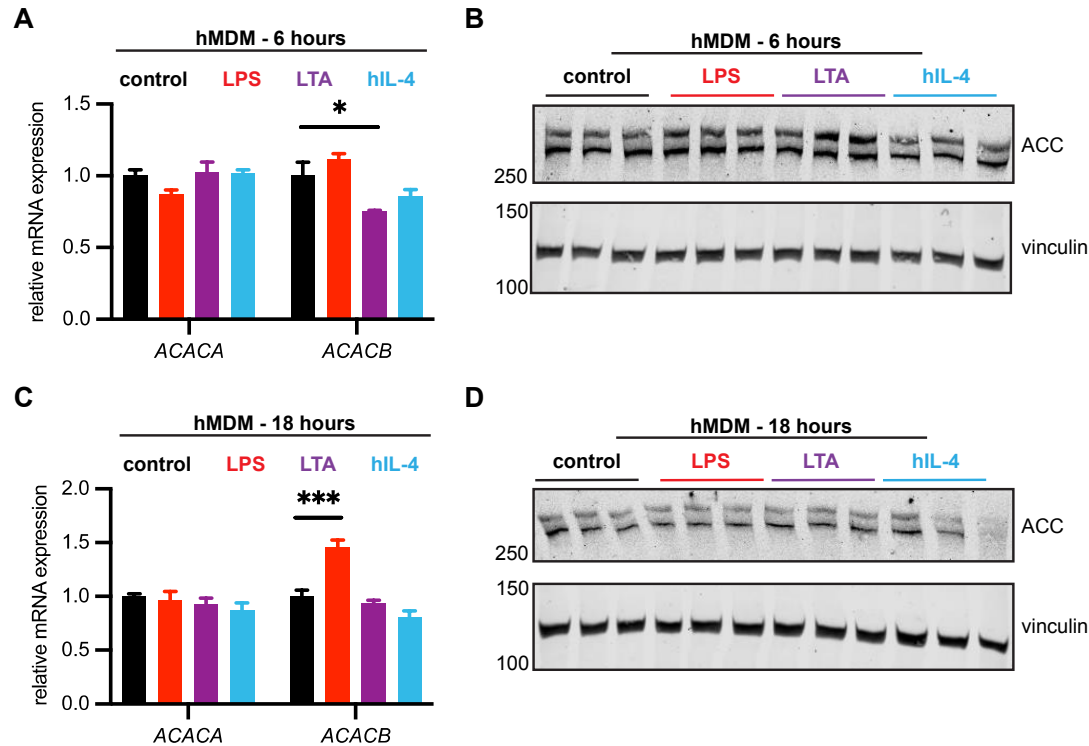

**Supplementary Figure 3, related to Figures 2 and 4.**

**A.** Relative mRNA expression of *ACACA* and *ACACB* in human MDMs treated with LPS (100ng/mL), LTA (1μg/ml) or hIL-4 (10ng/mL) for 6 hours (n = 4).

**B.** Immunoblot of ACC in human MDMs treated with LPS (100ng/mL), LTA (1μg/ml) or hIL-4 (10ng/mL) for 6 hours (n = 3). Vinculin was used as a loading control.

**C.** Relative mRNA expression of *ACACA* and *ACACB* in human MDMs treated with LPS (100ng/mL), LTA (1μg/ml) or hIL-4 (10ng/mL) for 18 hours (n = 4).

**D.** Immunoblot of ACC in human MDMs treated with LPS (100ng/mL), LTA (1μg/ml) or hIL-4 (10ng/mL) for 18 hours (n = 3). Vinculin was used as a loading control.

Data are represented as mean±SEM. Significance determined by One-Way ANOVA (A, C). \*  $P < 0.05$ , \*\*\*  $P < 0.001$ .

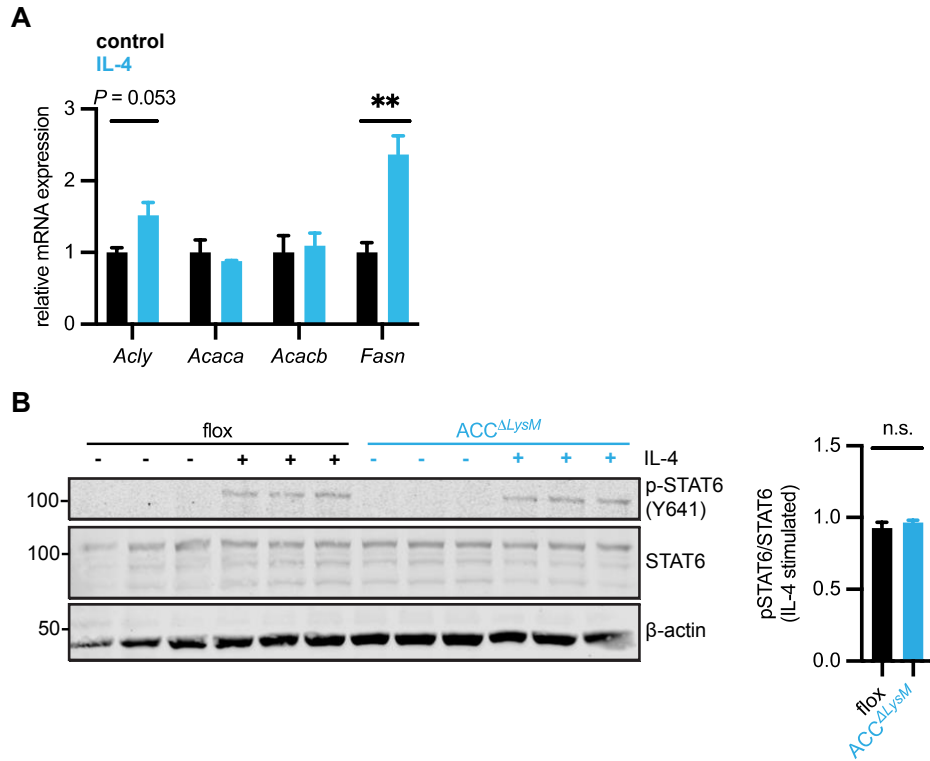

**Supplementary Figure 4, related to Figure 4**

**A.** Relative mRNA expression of *Acly*, *Acaca*, *Acacb*, and *Fasn* in BMDMs stimulated with IL-4 (10ng/mL) for 6 hours (n = 4).

**B.** Whole-cell immunoblot analysis of STAT6 phosphorylation at Y64 in flox or ACC $\Delta$ LysM BMDMs stimulated with IL-4 (10ng/ml) for 6 hours (n = 3 mice per group). B-actin was used as a loading control.

Data are represented as mean $\pm$ SEM. Significance determined by one-tailed Welch's t-test (A, B).

\*\*  $P < 0.01$

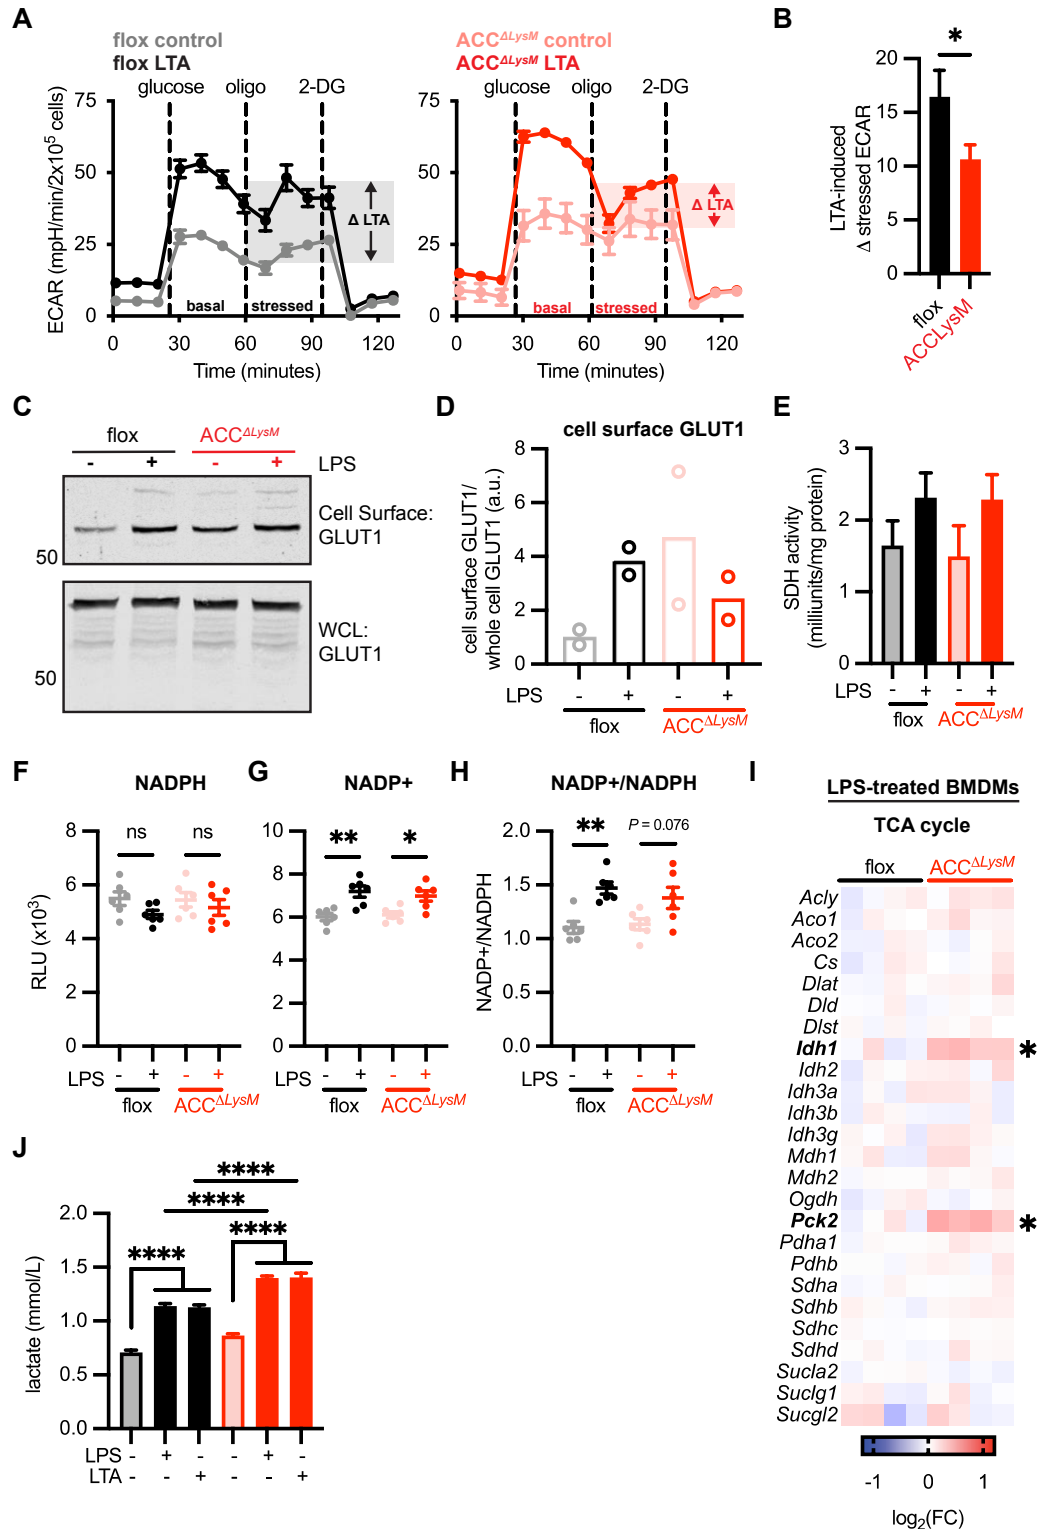

### Supplementary Figure 5, Related to Figure 5

**A.** Glycolytic stress test of flox (black, left) or ACC<sup>ΔLysM</sup> (red, right) BMDMs after stimulation with LTA for 16 hours. Shaded areas represent the LT+LTA-induced increase in stressed (post-oligomycin) ECAR (n = 5).



**B.** Quantification of LTA-induced change in stressed ECAR in flox or ACC<sup>ΔLysM</sup> BMDMs after 16-hour stimulation with LPS (n = 5).

**C.** Representative immunoblot and **D.** semi-quantification of cell-surface and whole cell GLUT1 of flox or ACC<sup>ΔLysM</sup> BMDMs treated with LPS for 6 hours subjected to cell-surface biotinylation protocol (n = 2 biological replicates).

**D.** Succinate dehydrogenase activity of flox or ACC<sup>ΔLysM</sup> BMDMs treated with LPS for 6 hours (n = 6).

**F.** NADPH and **G.** NADP<sup>+</sup> levels in BMDMs from flox or ACC<sup>ΔLysM</sup> BMDMs treated with LPS for 6 hours (n = 6).

**H.** NADP<sup>+</sup>/NADPH ratio in BMDMs from flox or ACC<sup>ΔLysM</sup> BMDMs treated with LPS for 6 hours (n = 6).

**I.** Heat map of relative expression of genes related to the tricarboxylic acid (TCA) cycle in LPS-treated flox and ACC<sup>ΔLysM</sup> BMDMs (n = 4).

**J.** Supernatant lactate of flox or ACC<sup>ΔLysM</sup> BMDMs unstimulated or after 6 hours of LPS or LTA stimulation (n = 6).

Data are represented as mean±SEM. Significance determined by One-Way ANOVA (C, E, G, H, J) or one-tailed Welch's t-test (B,I) or. \*  $P < 0.05$ , \*\*  $P < 0.01$ , \*\*\*\*  $P < 0.0001$ .

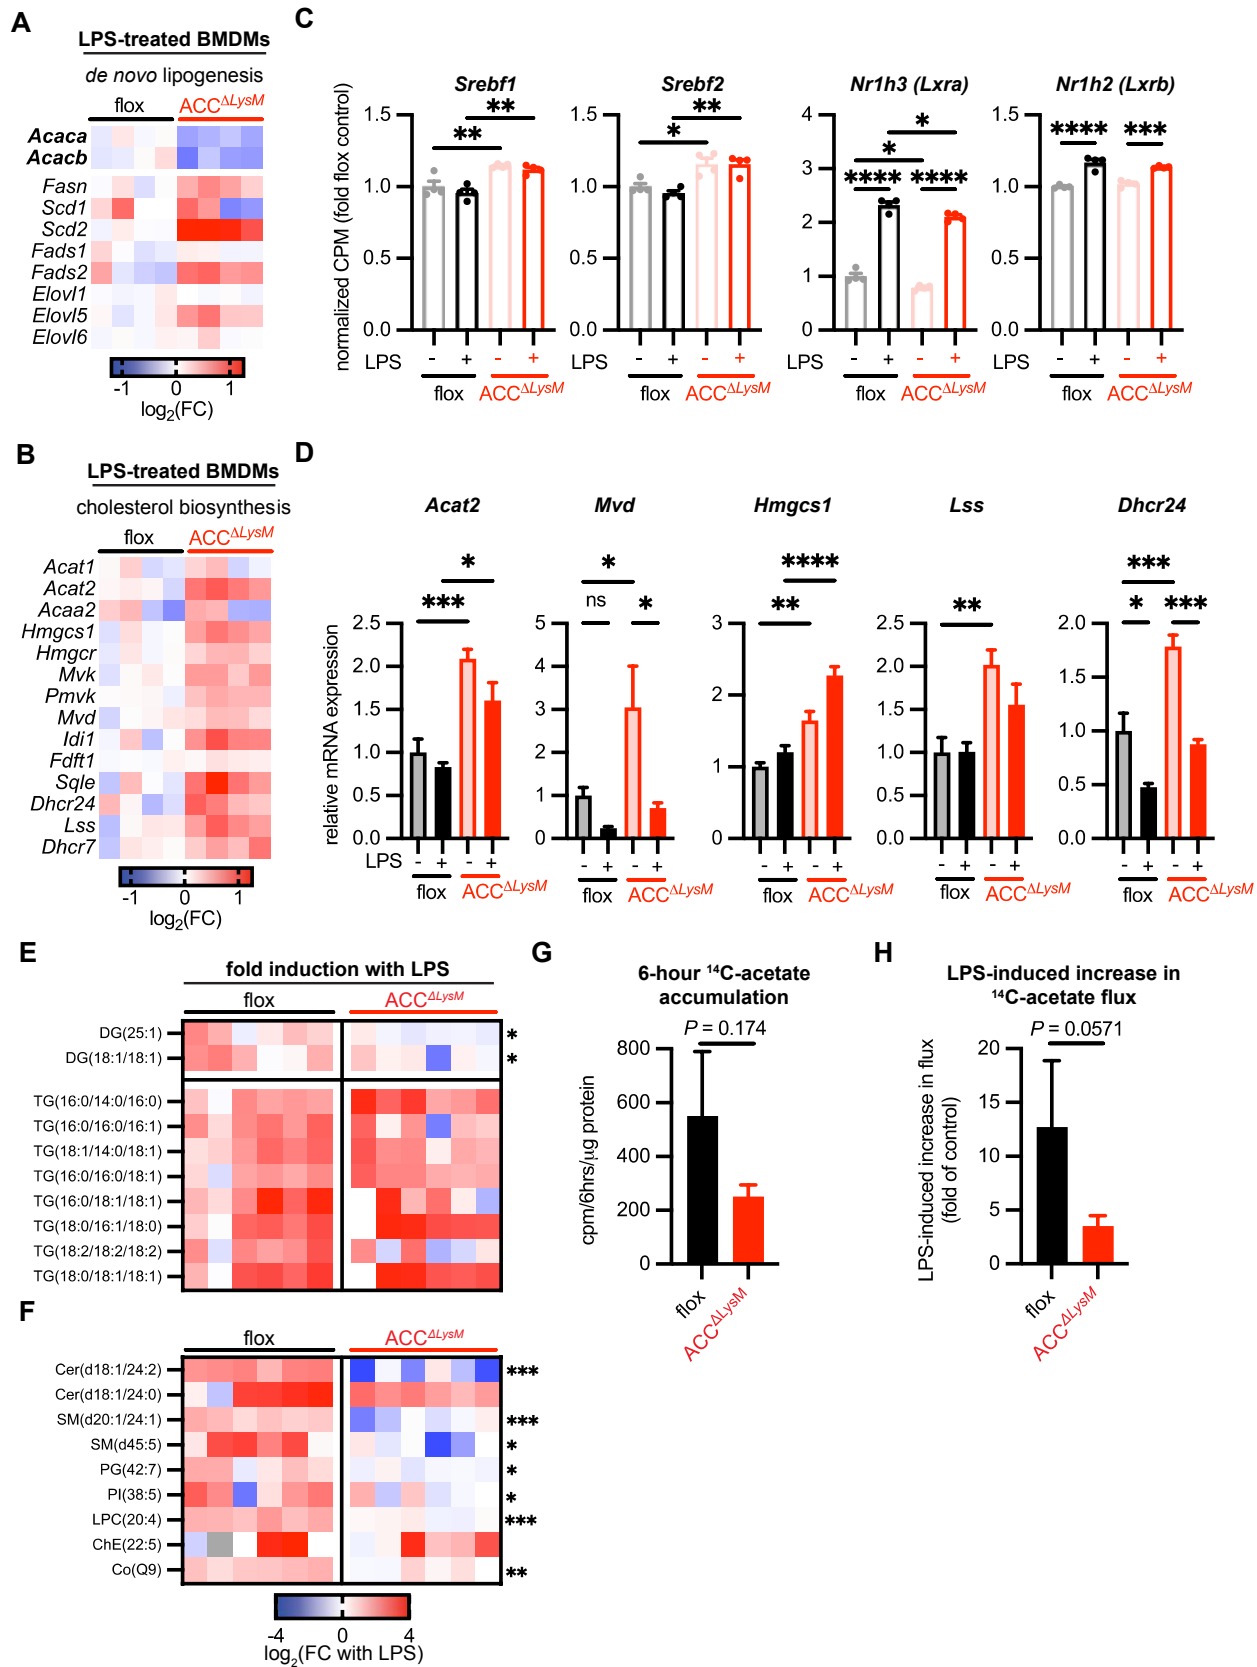

**Supplementary Figure 6, related to Figure 6.**

**A.** Heat map of relative expression of genes in the *de novo* lipogenesis pathway in LPS-treated flox and ACC<sup>ΔLysM</sup> BMDMs (n = 4).

**B.** Heat map of relative expression of genes in the cholesterol biosynthesis pathway in LPS-treated flox and ACC<sup>ΔLysM</sup> BMDMs (n = 4).

**C.** Relative expression of transcription factor genes *Srebf1*, *Srebf2*, *N21h3*, and *Nr1h2* in flox and ACC<sup>ΔLysM</sup> BMDMs after control and LPS stimulation (n = 4).

**D.** Expression of cholesterol pathway genes from in flox and ACC<sup>ΔLysM</sup> BMDMs after control and LPS stimulation was confirmed by qPCR (n = 4).

**E.** Heat map of significantly increased diacylglycerol (DAG) and triacylglycerol (TAG) species in LPS-stimulated flox and ACC<sup>ΔLysM</sup> BMDMs, relative to respective unstimulated cells (n = 6).

**F.** Heat map of significantly increased ceramide, sphingomyelin, and other lipid species in LPS-stimulated flox and ACC<sup>ΔLysM</sup> BMDMs, relative to respective unstimulated cells (n = 6).

**G.** Accumulation of <sup>14</sup>C-acetate signal in the lipid-soluble fraction of flox or ACC<sup>ΔLysM</sup> BMDMs after 6 hours (n = 4).

**H.** BMDMs were stimulated with control or LPS (100ng/ml) for 4 hours, before corresponding media containing <sup>14</sup>C-acetate was added for 2 hours. Fold increase in <sup>14</sup>C-acetate flux into lipid-soluble fraction was determined (flox, n = 3; ACC<sup>ΔLysM</sup>, n = 4)

Significance determined by two-tailed Student's t-test (E,F), one-tailed Mann-Whitney test (G,H) or One-Way ANOVA (C,D). \*  $P < 0.05$ , \*\*  $P < 0.01$ , \*\*\*  $P < 0.001$ , \*\*\*\*  $P < 0.0001$

**Supplementary Table 1. Primer Sequences for RT-qPCR**

| Gene                | Forward Primer             | Reverse Primer           | Source      |
|---------------------|----------------------------|--------------------------|-------------|
| <i>Mus musculus</i> |                            |                          |             |
| <i>Acaca</i>        | GTCTGCTGGGAAGTTAATCCAG     | TCCTGCAGCTCTAGCAGAGG     | (25)        |
| <i>Acacb</i>        | ACAGAGATTCACCGTCGCGT       | CGCAGCGATGCCATTGT        | (25)        |
| <i>Il6</i>          | ACAACGATGATGCACTTGCAAG     | GCATTGGAAATTCGGGTAGGAA   | (62)        |
| <i>Il1b</i>         | CAAATACCTGTGGCCTTGG        | TACCAGTTGGGGAACCTCTGC    | (7)         |
| <i>Il18</i>         | GACTCTTGCGTCAACTTCAAGG     | CAGGCTGTCTTTTGTCAACGA    | Primer Bank |
| <i>Arg1</i>         | AAGACAGCAGAGGAGGTGAAGAG    | TGGGAGGAGAAGGCGTTTGC     | (7)         |
| <i>Chil3</i>        | CTTCCACAGGAGCAGGAATC       | GCTCCATGGTCCTTCCAGTA     | (6)         |
| <i>Ifnγ</i>         |                            |                          |             |
| <i>Nos2</i>         | CCTGGTACGGGCATTGCT         | GCTCATGCCTCCTT           | (7)         |
| <i>B2m</i>          | ATCACCCCCACTGAGACTG        | TGCTATTTCTTTCTGCGTGC     | (6)         |
| <i>Hprt</i>         | TGAAGTACTCATTATAGTCAAGGGCA | CTGGTGAAAAGGACCTCTCG     | (29)        |
| <i>Mrc1</i>         |                            |                          | Primer Bank |
| <i>Retnla</i>       | CCAATCCAGCTAACTATCCCTCC    | CCAGTCAACGAGTAAGCACAG    | Primer Bank |
| <i>Il12a</i>        | CTGTGCCTTGGTAGCATCTATG     | GCAGAGTCTCGCCATTATGATTC  | Primer Bank |
| <i>Il12b</i>        | TGGTTTGCCATCGTTTTGCTG      | ACAGGTGAGGTTCACTGTTTCT   | Primer Bank |
| <i>Aldoc</i>        | TCTCTCTTGGGATCAGGGGG       | CAGGTGAACCCTTCCTCCAC     | (6)         |
| <i>Gapdh</i>        | TGAAGGGTGGAGCCAAAAGG       | ACTTGGCAGGTTTCTCCAGG     | (6)         |
| <i>Pfkfb3</i>       | AACGGATGTCTCCCGGTTTC       | TGGTATGGAGGCTGCTCTCT     | Primer Bank |
| <i>Acly</i>         | TGATGGGAGAAGTTGGGAAG       | ATCAGCTCGGGACTCAGAAA     | Primer Bank |
| <i>Fasn</i>         | GGAGGTGGTGATAGCCGGTAT      | TGGGTAATCCATAGAGCCCAG    | Primer Bank |
| <i>Acat2</i>        | CCCGTGGTCATCGTCTCAG        | GGACAGGGCACCATTGAAGG     | Primer Bank |
| <i>Mvd</i>          | ATGGCCTCAGAAAAGCCTCAG      | TGGTCGTTTTTAGCTGGTCCT    | Primer Bank |
| <i>Hmgcs1</i>       | AACTGGTGCAGAAATCTCTAGC     | GGTTGAATAGCTCAGAAGTACC   | Primer Bank |
| <i>Lss</i>          | TCGTGGGGGACCCTATAAAAC      | CGTCCCTCCGCTTGATAATAAGTC | Primer Bank |
| <i>Dhr24</i>        | CTCTGGGTGCGAGTGAAGG        | TTCCCGGACCTGTTTCTGGAT    | Primer Bank |
| <i>Cd80</i>         | GCTGTGTCGTTCAAAGAAGGA      | TGGGAAATTGTCGTATTGATGCC  | Primer Bank |
| <i>Cd86</i>         | GAGCTGGTAGTATTTTGGCAGG     | GGCCCAGGTAAGTGGCATT      | Primer Bank |
| <i>Il10</i>         | ACTACCAAAGCCACAAGGCA       | TGGCAACCCAAGTAACCCTTA    | (6)         |
| <i>Homo sapiens</i> |                            |                          |             |
| <i>ACACA</i>        | CATGCGGTCTATCCGTAGGTG      | GTGTGACCATGACAACGAATCT   | Primer Bank |
| <i>ACACB</i>        | AGAAGACAAGAAGCAGGCAAAC     | GTAGACTCACGAGATGAGCCA    | Primer Bank |
| <i>IL6</i>          | ACTCACCTCTTCAGAACGAATTG    | CCATCTTTGGAAGGTTCAAGTTG  | Primer Bank |

|              |                      |                        |                |
|--------------|----------------------|------------------------|----------------|
| <i>IL1B</i>  | AGCTACGAATCTCCGACCAC | CGTTATCCCATGTGTCGAAGAA | Primer<br>Bank |
| <i>RPS18</i> | GCGGCGGAAAATAGCCTTTG | GATCACACGTTCCACCTCATC  | Primer<br>Bank |

**Data S1. Lipidomics\_Data**

Summary data for lipidomics experiment from unstimulated or LPS-treated flox and ACC<sup>*ΔLysM*</sup> BMDMs.

**Data S3. Source\_Data\_File**

Source Data for figures.

Data S2. Uncropped\_Gels\_Blots: Summary PDF of uncropped gels and blots.

## **Macrophage acetyl-CoA carboxylase regulates acute inflammation through control of glucose and lipid metabolism**

Scott Yeudall<sup>1</sup>, Clint M Upchurch<sup>1</sup>, Philip V Seegren<sup>1</sup>, Caitlin M Pavelec<sup>1,2</sup>, Jan Greulich<sup>3</sup>, Michael C Lemke<sup>1</sup>, Thurl E Harris<sup>1</sup>, Bimal N Desai<sup>1</sup>, Kyle L Hoehn<sup>1,4</sup>, and Norbert Leitinger<sup>1,2</sup>

<sup>1</sup> Department of Pharmacology,

<sup>2</sup> Robert M Berne Cardiovascular Research Center,  
University of Virginia School of Medicine, Charlottesville, Virginia 22908

<sup>3</sup>Environmentally-Induced Cardiovascular Degeneration, Clinical Chemistry and Laboratory Diagnostics, Medical Faculty, University Hospital and Heinrich-Heine University Düsseldorf, 40225 Düsseldorf, Germany

<sup>4</sup>School of Biotechnology and Biomolecular Sciences,  
University of New South Wales, Sydney, Australia 2052.

Uncropped blots and gels

Full unedited blots for Figure 1C

MW

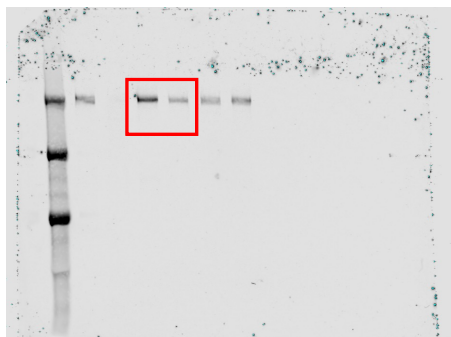

← pan-ACC (CST #3676, C83B10)

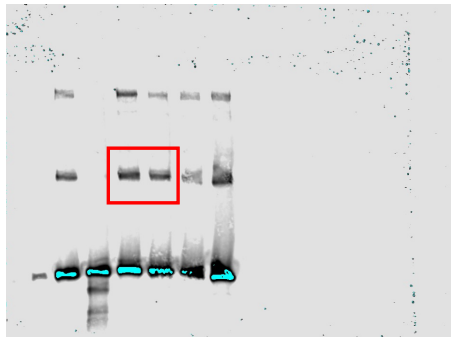

IRDye-800CW conjugated streptavidin (Licor # 926-32230)

← IR800-conjugated avidin (for biotinylated proteins) for pyruvate carboxylase

← IR800-conjugated avidin (for biotinylated proteins) for propionyl-coA carboxylase (blue indicates saturation of detection on Licor instrument)

Samples after streptavidin pulldown of cell lysates – lanes alternate flox and ACC<sup>ΔLysM</sup> BMDMs. Lanes 3 and 4 are shown in figure 1C.



Full unedited blots for Figure 4C

MW      flox      flox      ACC $\Delta$ LysM      ACC $\Delta$ LysM  
         -IL4      +IL4      -IL4      +IL4

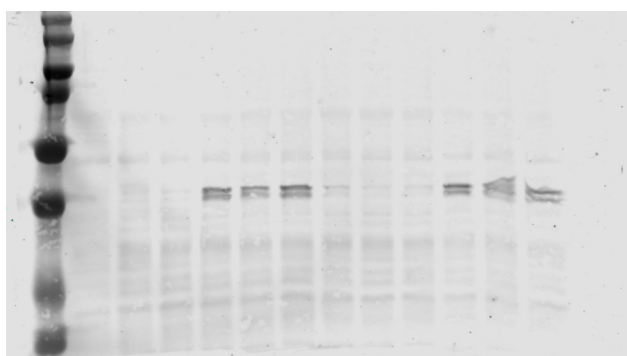

← Arginase (SCBT #sc-18354)

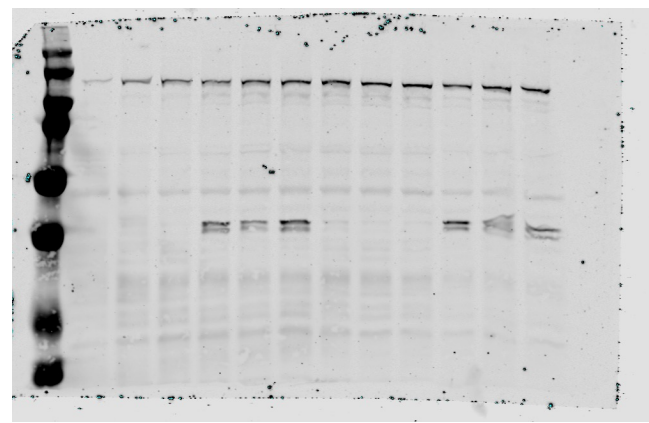

← Vinculin (E1E9V, CST #13901)

← (previous Arginase staining above)

Full unedited blots for Supplementary Figure 1E

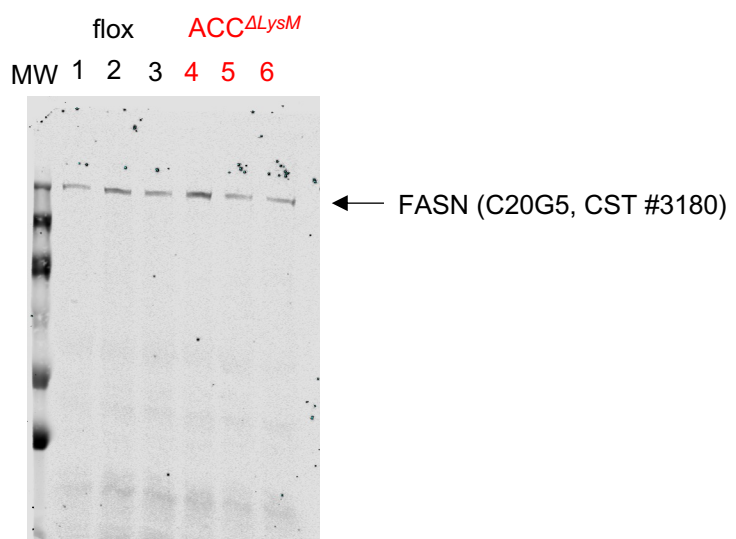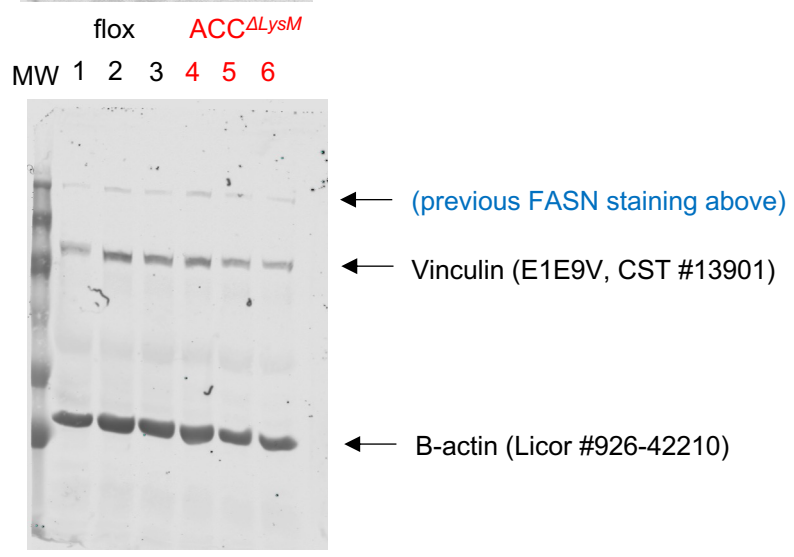

Lanes 3 and 4 displayed in Supplementary Figure 1E

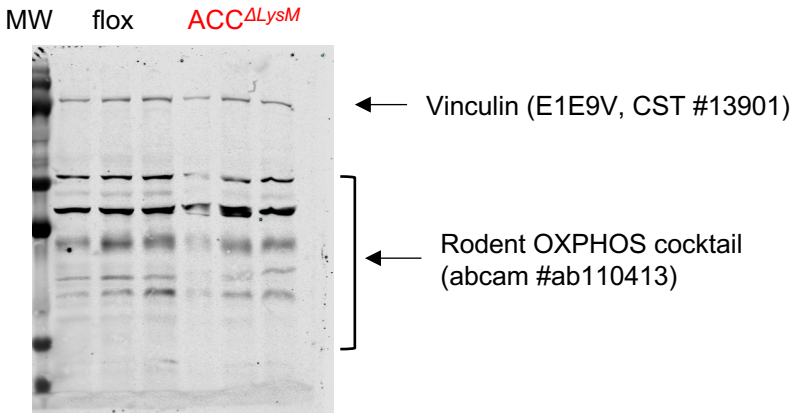

Full unedited blots for Supplementary Figure 2B

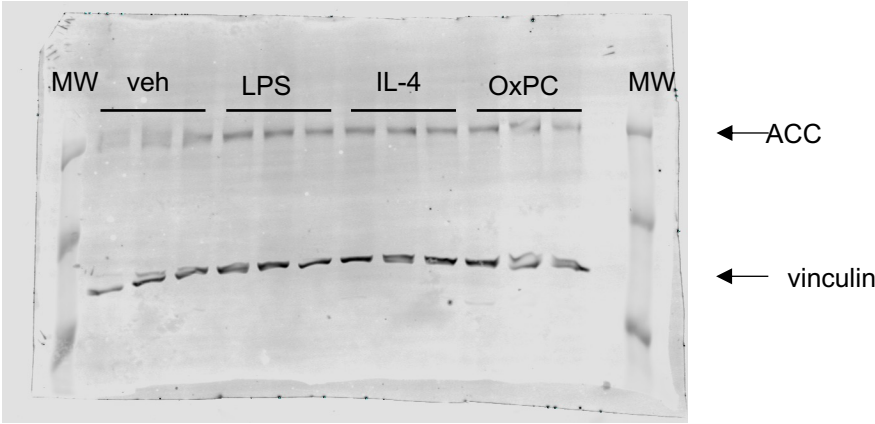

Full unedited blots for Supplementary Figure 2E

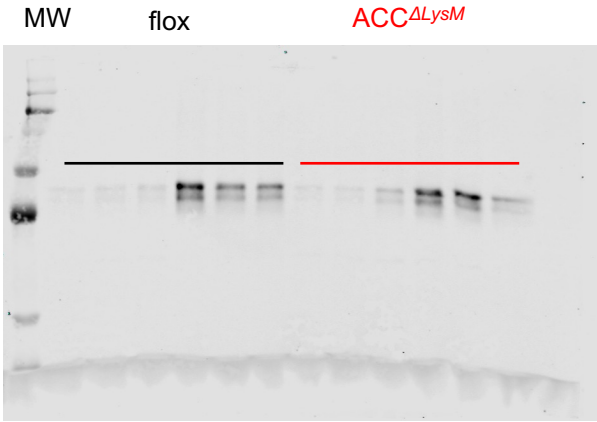

← p-ERK1/2 (T202/Y204) (CST #9101)

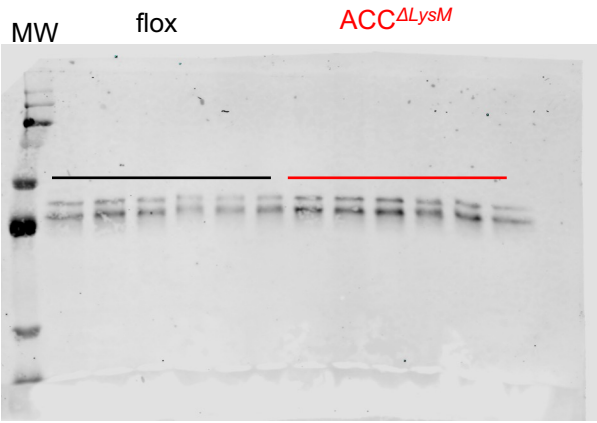

← ERK1/2 (L34F12, CST #4696)

Full unedited blots for Supplementary Figure 2F

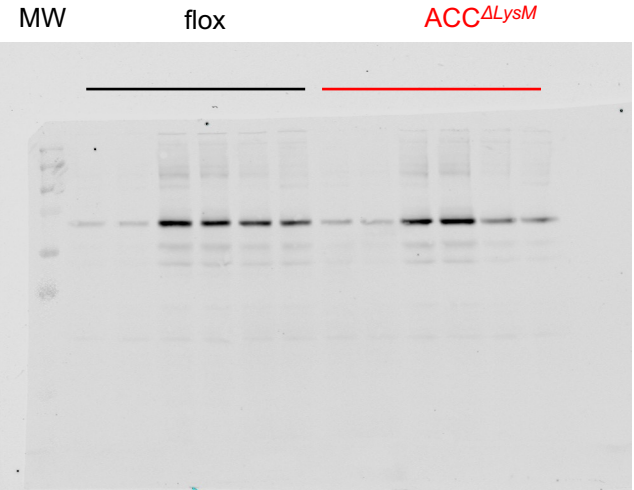

← p-p65 NFκB (S536) (93H1, CST #3033)

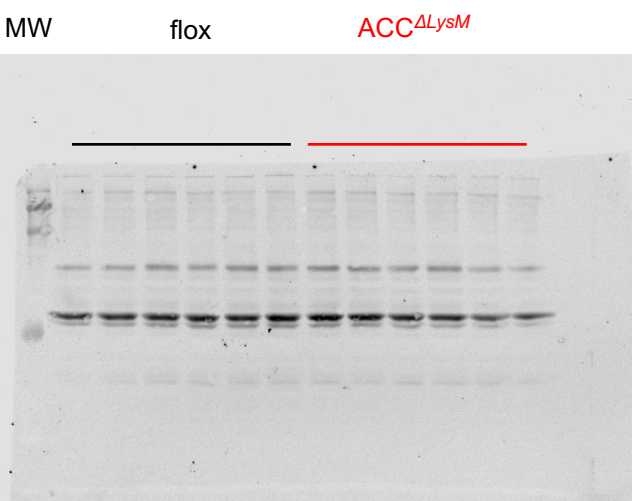

← p65 NFκB (D14E12, CST #8242)

← B-actin (Licor #926-42210)

cytoplasmic

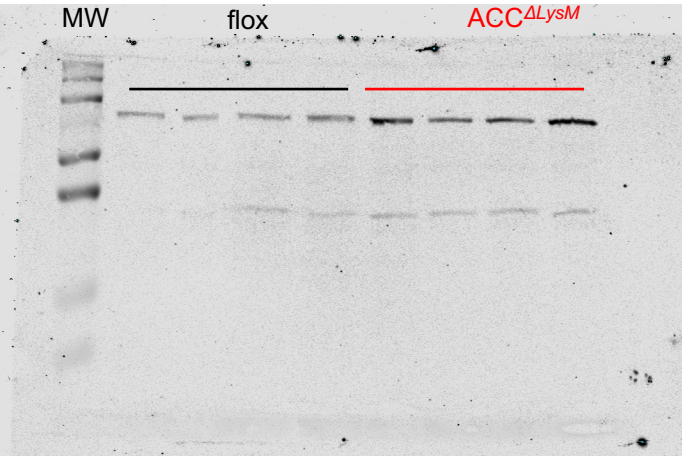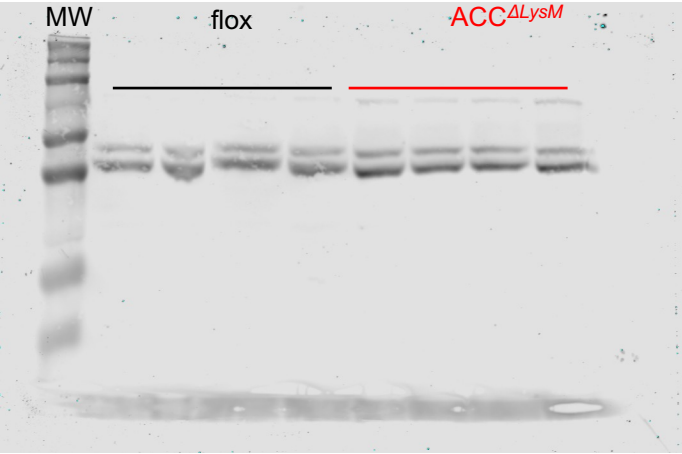

Full unedited blots for Supplementary Figure 2G

nuclear

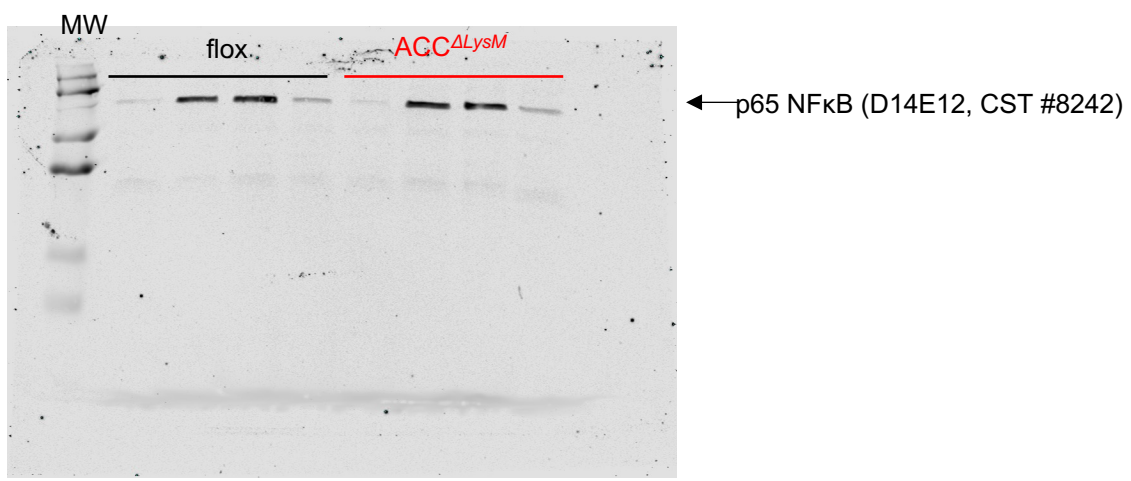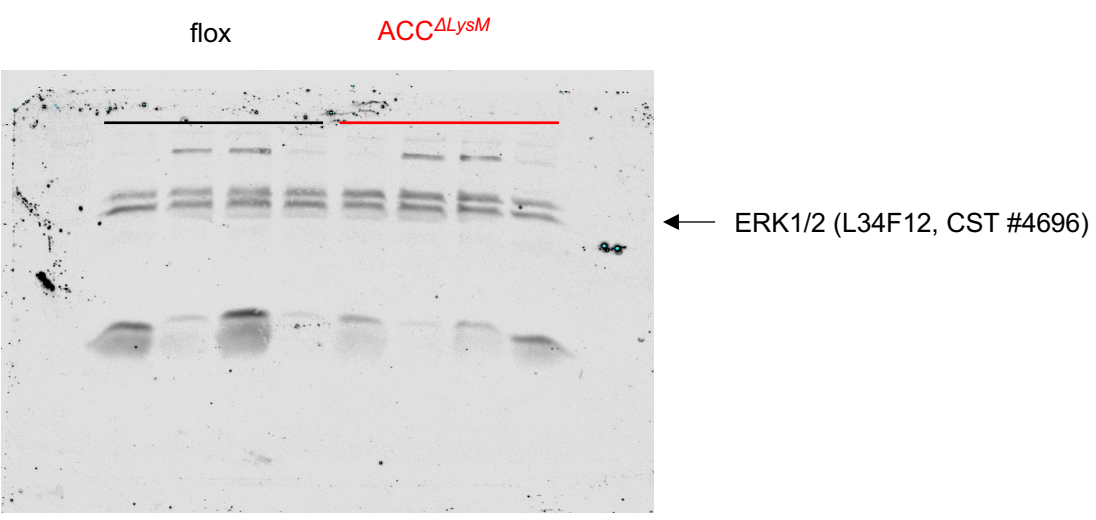



Full unedited blots for Supplementary Figure 3B

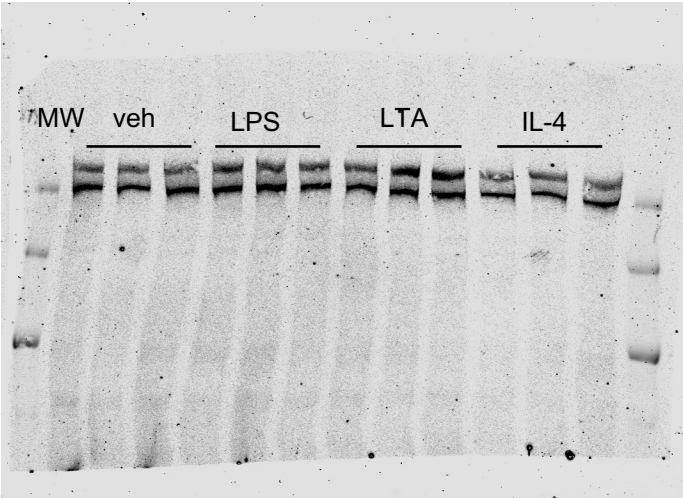

← ACC

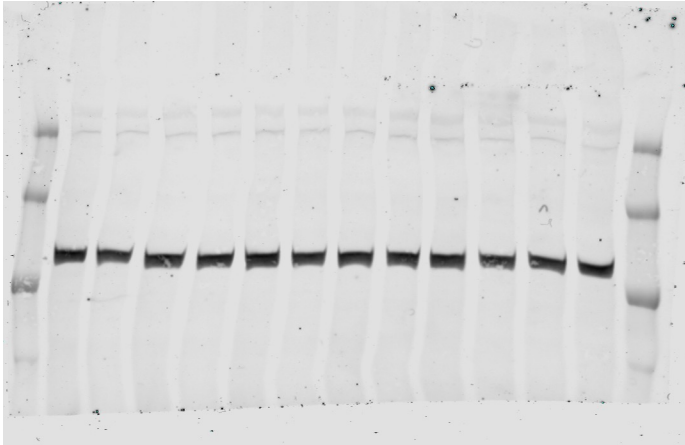

← vinculin

Full unedited blots for Supplementary Figure 3D

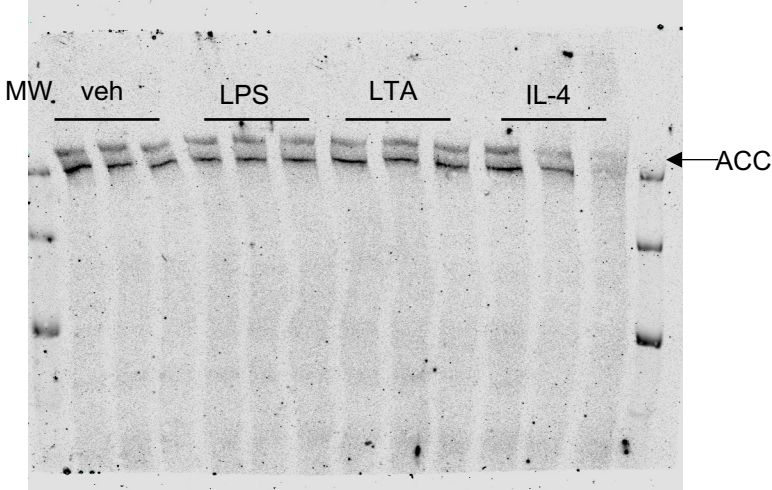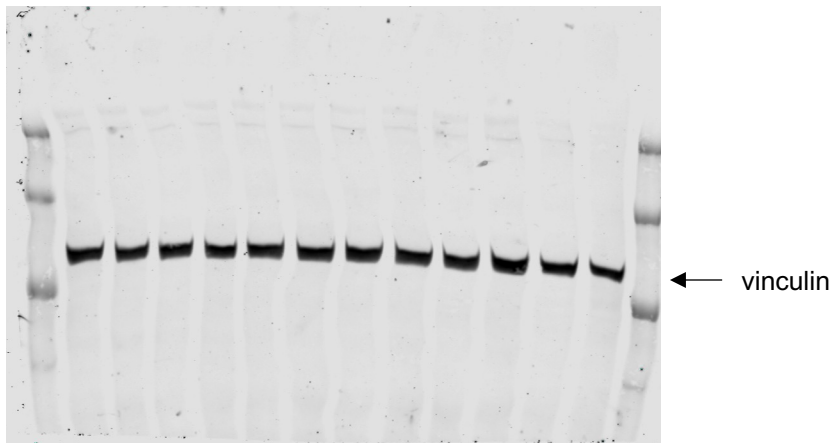

Full unedited blots for Figure S4B

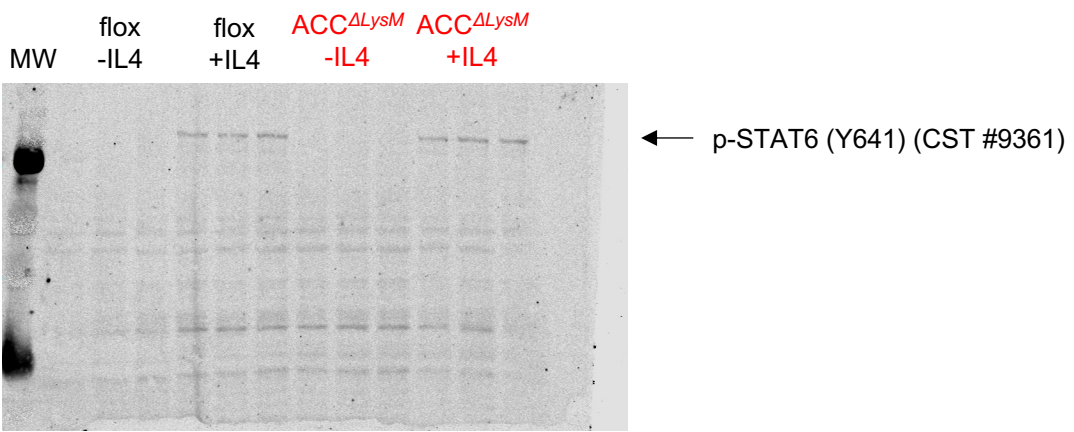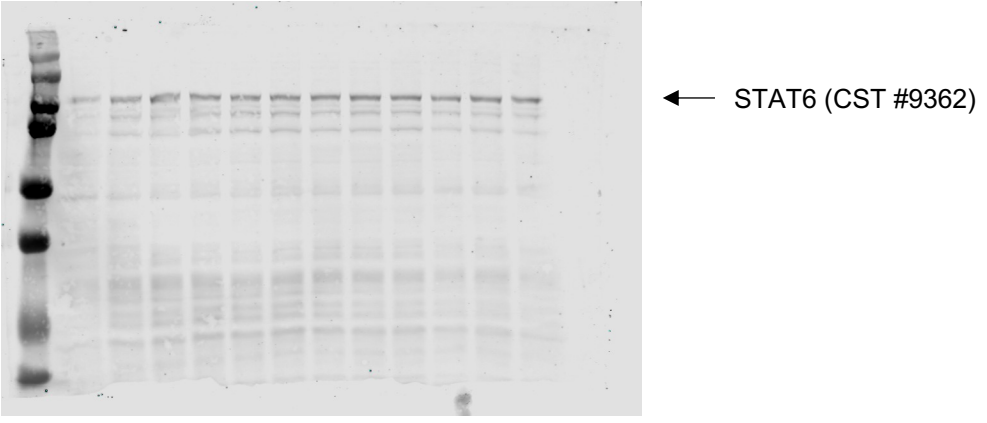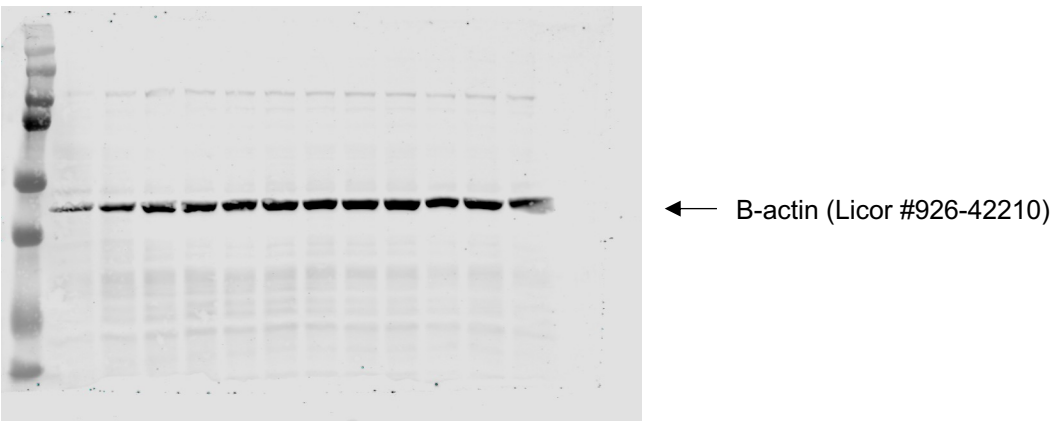

Full unedited blots for Figure S5C

Cell-surface biotin pulldown

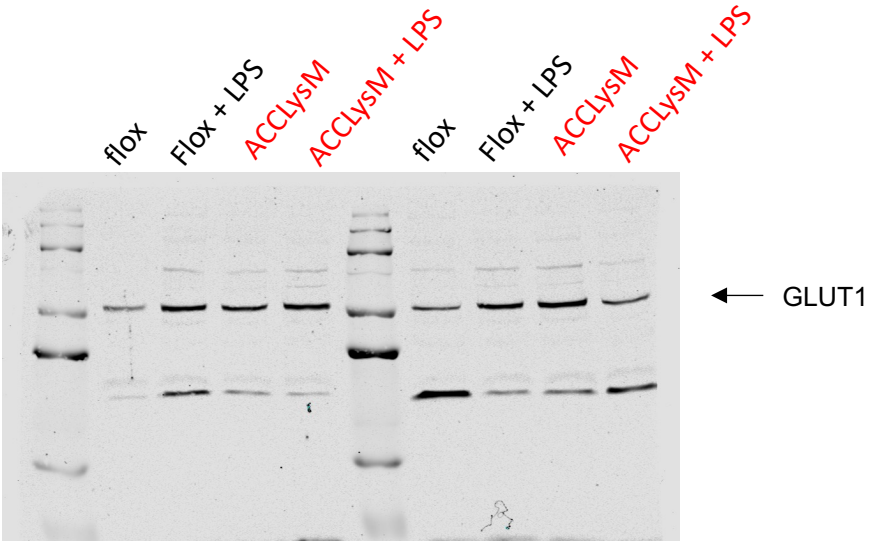

Input: whole cell lysate

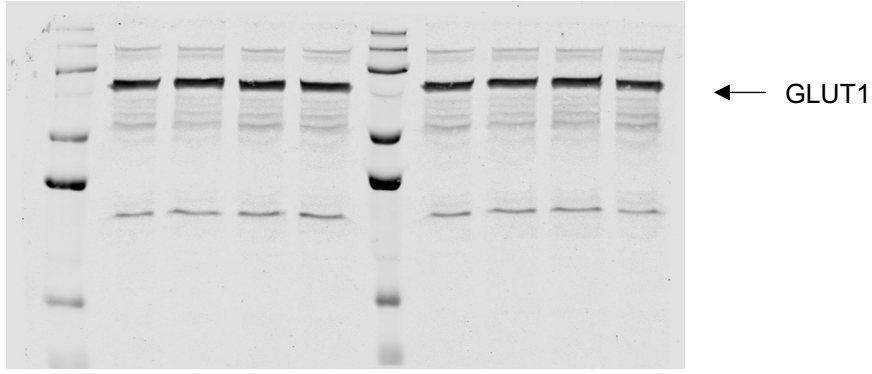

Full unedited gels for Supplementary Figure 1A – DNA gels

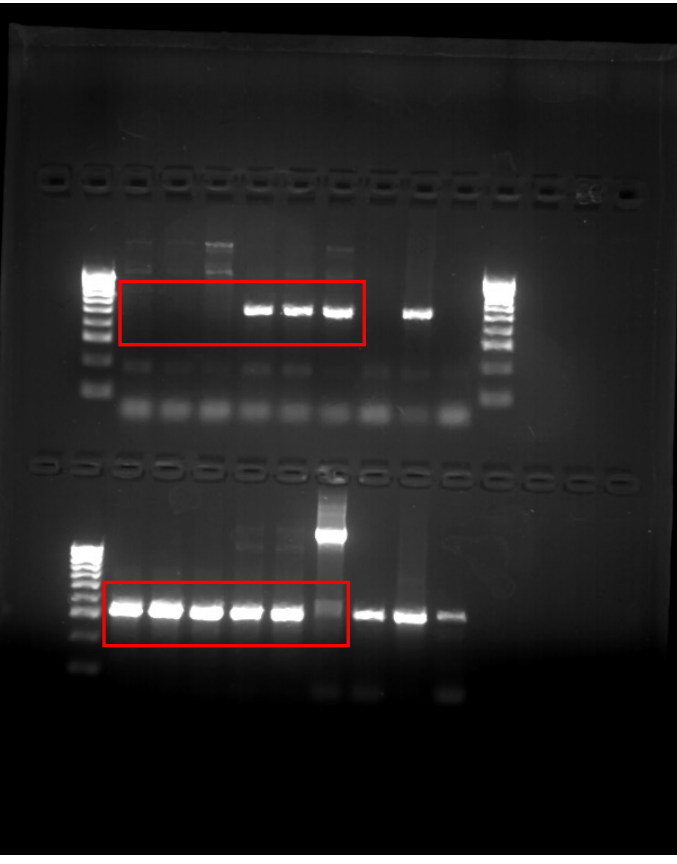

← LysM Cre transgene

← LysM WT gene

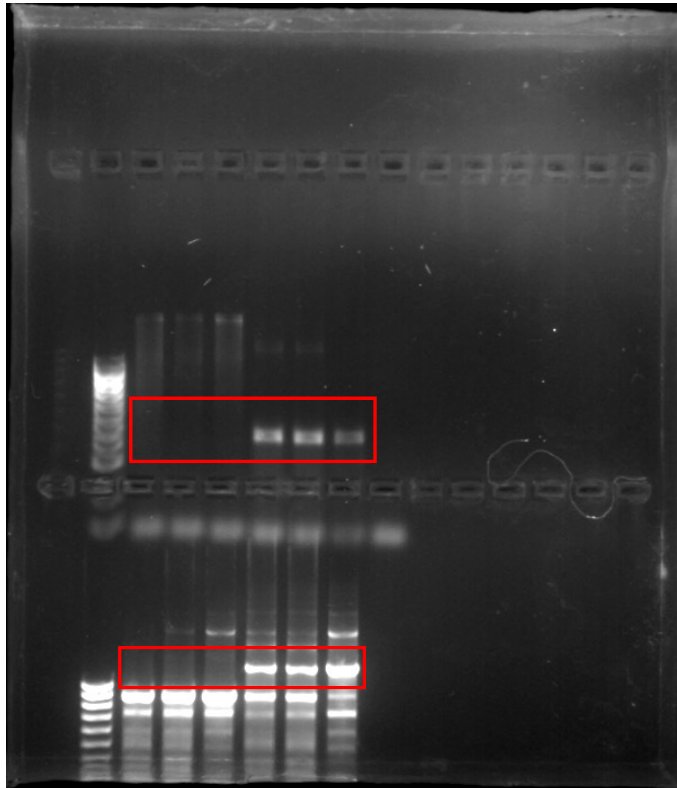

← *Acaca* – cre-mediated recombination

← *Acacb* – cre-mediated recombination
